# Supplementary material
Source: PubMed Central journal article supplement (PMC6619426)
Supplement: NIHMS908127-supplement-Supplemental_Info.pdf [file NIHMS908127-supplement-Supplemental_Info.pdf]

## Hypothyroidism Literature Search

| Database     | Articles Retrieved | Articles after removing duplicates |
|--------------|--------------------|------------------------------------|
| Embase.com   | 3236               | 3138                               |
| Medline ovid | 2957               | 984                                |
| Cochrane     | 151                | 35                                 |
| <b>Total</b> | <b>6344</b>        | <b>4157</b>                        |

### Embase.com

('hypothyroidism'/de/mj OR (hypothyroid\*):ti) AND ('epidemiology'/de OR 'epidemiological data'/de OR 'incidence'/de OR 'prevalence'/de OR 'screening'/de OR 'etiology'/exp OR 'risk factor'/de OR 'diagnosis'/exp OR 'hypothyroidism'/de/dm\_th OR 'thyromimetic agent'/exp OR 'Hashimoto disease'/de OR 'autoimmune disease'/de OR 'autoimmunity'/de OR 'hormonal therapy'/de OR 'hormone substitution'/de OR 'pregnancy'/de OR 'pregnant woman'/de OR 'prognosis'/de OR 'quality of life'/de OR 'wellbeing'/de OR (epidemiolog\* OR etiolog\* OR aetiolog\* OR pathogenes\* OR (clinical\* NEAR/3 presentat\*) OR complication\* OR diagnos\* OR ((therap\* OR treat\*) NEAR/6 (hypothyroid\*)) OR (hormon\* NEAR/3 (therap\* OR replace\* OR substitut\*)) OR thyromimetic\* OR levothyroxin\* OR thyroxin\* OR Hashimoto OR autoimmun\* OR risk-factor\* OR inciden\* OR prevalen\* OR screen\* OR pregnan\* OR prognos\* OR 'quality of life' OR wellbeing OR well-being OR sequel\* OR persist\*):ab,ti) AND ('observational study'/exp OR 'cohort analysis'/exp OR 'longitudinal study'/exp OR 'retrospective study'/exp OR 'prospective study'/exp OR 'epidemiological data'/de OR 'case control study'/de OR 'cross-sectional study'/de OR 'correlational study'/de OR 'population research'/de OR 'family study'/de OR 'major clinical study'/de OR 'multicenter study'/de OR 'comparative study'/de OR 'follow up'/de OR 'clinical study'/de OR 'clinical article'/de OR 'clinical trial'/exp OR 'randomization'/exp OR 'intervention study'/de OR 'open study'/de OR 'community trial'/de OR 'review'/exp OR 'systematic review'/exp OR 'meta analysis'/de OR (((observation\* OR epidemiolog\* OR famil\* OR comparativ\* OR communit\*) NEAR/6 (stud\* OR data OR research)) OR cohort\* OR longitudinal\* OR retrospectiv\* OR prospectiv\* OR population\* OR (national\* NEAR/3 (stud\* OR survey)) OR (health\* NEAR/3 survey\*) OR ((case OR cases OR match\*) NEAR/3 control\*) OR (cross NEXT/1 section\*) OR correlation\* OR multicenter\* OR multi-center\* OR follow-up\* OR followup\* OR clinical\* OR trial OR random\* OR review\* OR meta-analy\*):ab,ti) AND [2000-2016]/py NOT ([Conference Abstract]/lim OR [Letter]/lim OR [Note]/lim OR [Editorial]/lim) AND [english]/lim NOT (child/exp NOT adult/exp)

### Medline ovid

(\*"Hypothyroidism"/ OR (hypothyroid\*):ti.) AND ("epidemiology"/ OR "hypothyroidism"/ep OR "Epidemiologic Methods"/ OR "incidence"/ OR "prevalence"/ OR "Mass Screening"/ OR etiology.xs. OR Causality/ OR "risk factors"/ OR "diagnosis"/ OR "hypothyroidism"/di OR "hypothyroidism"/th OR "Hashimoto Disease"/ OR "Autoimmune Diseases"/ OR "autoimmunity"/ OR "Hormone Replacement Therapy"/ OR exp "pregnancy"/ OR "pregnant women"/ OR "prognosis"/ OR "quality of life"/ OR (epidemiolog\* OR etiolog\* OR aetiolog\* OR pathogenes\* OR (clinical\* ADJ3 presentat\*) OR

complication\* OR diagnos\* OR ((therap\* OR treat\*) ADJ6 (hypothyroid\*)) OR (hormon\* ADJ3 (therap\* OR replace\* OR substitut\*)) OR thyromimetic\* OR levothyroxin\* OR thyroxin\* OR Hashimoto OR autoimmun\* OR risk-factor\* OR inciden\* OR prevalen\* OR screen\* OR pregnan\* OR prognos\* OR "quality of life" OR wellbeing OR well-being OR sequel\* OR persist\*).ab,ti.) AND ("observational study"/ OR exp "Epidemiologic Studies"/ OR "multicenter study"/ OR "comparative study"/ OR "clinical study"/ OR exp "clinical trial"/ OR "Random Allocation"/ OR "review"/ OR "Meta-Analysis"/ OR (((observation\* OR epidemiolog\* OR famil\* OR comparativ\* OR communit\*) ADJ6 (stud\* OR data OR research)) OR cohort\* OR longitudinal\* OR retrospectiv\* OR prospectiv\* OR population\* OR (national\* ADJ3 (stud\* OR survey)) OR (health\* ADJ3 survey\*) OR ((case OR cases OR match\*) ADJ3 control\*) OR (cross ADJ section\*) OR correlation\* OR multicenter\* OR multi-center\* OR follow-up\* OR followup\* OR clinical\* OR trial OR random\* OR review\* OR meta-analy\*).ab,ti.) AND (2000.yr. OR 2001.yr. OR 2002.yr. OR 2003.yr. OR 2004.yr. OR 2005.yr. OR 2006.yr. OR 2007.yr. OR 2008.yr. OR 2009.yr. OR 2010.yr. OR 2011.yr. OR 2012.yr. OR 2013.yr. OR 2014.yr. OR 2015.yr. OR 2016.yr.) NOT (letter OR news OR comment OR editorial OR congresses OR abstracts).pt. AND english.la. NOT ((exp child/ OR exp infant/) NOT exp adult/)

## **Cochrane**

((hypothyroid\*):ti) AND ((epidemiolog\* OR etiolog\* OR aetiolog\* OR pathogenes\* OR (clinical\* NEAR/3 presentat\*) OR complication\* OR diagnos\* OR ((therap\* OR treat\*) NEAR/6 (hypothyroid\*)) OR (hormon\* NEAR/3 (therap\* OR replace\* OR substitut\*)) OR thyromimetic\* OR levothyroxin\* OR thyroxin\* OR Hashimoto OR autoimmun\* OR risk-factor\* OR inciden\* OR prevalen\* OR screen\* OR pregnan\* OR prognos\* OR 'quality of life' OR wellbeing OR well-being OR sequel\* OR persist\*):ab,ti) AND (((((observation\* OR epidemiolog\* OR famil\* OR comparativ\* OR communit\*) NEAR/6 (stud\* OR data OR research)) OR cohort\* OR longitudinal\* OR retrospectiv\* OR prospectiv\* OR population\* OR (national\* NEAR/3 (stud\* OR survey)) OR (health\* NEAR/3 survey\*) OR ((case OR cases OR match\*) NEAR/3 control\*) OR (cross NEXT/1 section\*) OR correlation\* OR multicenter\* OR multi-center\* OR follow-up\* OR followup\* OR clinical\* OR trial OR random\* OR review\* OR meta-analy\*):ab,ti)
